# Supplementary material
Source: ML conference proceedings conference paper supplement (https://proceedings.neurips.cc/paper_files/paper/2020/hash/c80d9ba4852b67046bee487bcd9802c0-Abstract.html)
Supplement: Supplementary file [file c80d9ba4852b67046bee487bcd9802c0-Supplemental.pdf]

## Appendix

### 406 A Proof of Lemma and Theorem

#### 407 A.1 Proof of Lemma 1

408 *Proof.* Let  $B_{jk}$  denote  $\text{Bal}(b_j, b_k)$ . Since  $0 \leq b_k \leq 1$  (as  $S = \sum_k b_k + K$ ), we have  $0 \leq B_{jk} \leq 1$ .  
 409 In addition,  $B_{jk} = 1$ , if  $b_j = b_k \neq 0$ ;  $B_{jk} = 0$ , if  $b_j b_k = 0$ . Thus, we have  $\sum_{j \neq k} b_j B_{jk} \leq \sum_{j \neq k} b_j$ ,  
 410 where the equality holds when  $B_{jk} = 1, \forall j$ . Therefore, we have

$$411 \text{diss}(\omega) = \sum_{k=1}^K b_k \left[ \frac{\sum_{j \neq k} b_j B_{jk}}{\sum_{j \neq k} b_j} \right] \quad (13)$$

$$412 \leq \sum_{k=1}^K b_k \stackrel{(a)}{=} \frac{\sum_{k=1}^K r_k}{S} \stackrel{(b)}{=} \frac{S - K}{S} = 1 - \frac{1}{C} \quad (14)$$

411 where (a) is due to the definition of  $b_k$  in equation 5 and (b) is due to the summation constraint in  
 412 equation 1 and  $W = K$ .  $\square$

#### 413 A.2 Proof of Lemma 2

414 *Proof.* Using the definition of uncertainty mass in equation 5 and substituting  $W$  by  $K$ , we have

$$0 \leq \text{vac}(\omega) = \frac{K}{S} = \frac{K}{\sum_{k=1}^K r_k + K} \leq 1 \quad (15)$$

415 where equality is achieved when  $\sum_{k=1}^K r_k = 0$ .  $\square$

#### 416 A.3 Proof of Theorem 1

417 *Proof.* For (1),  $(\Rightarrow)$  is easy to show as  $S = K$  implies  $\sum_{k=1}^K r_k = 0$  and  $\text{vac}(\omega_{y^*}) = 1$ ; for  $(\Leftarrow)$ ,  
 418 using equation 2 and non-informative base rates, we have  $P(y^* = k) = 1/K, \forall k$ , which achieves a  
 419 maximum  $H[y^*]$  as  $\log K$ .

420 For (2), we first prove  $(\Rightarrow)$ . For  $y^* = \arg \max H[y]$ , we have  $P(y^* = k) = 1/K, \forall k$ . Thus,  
 421  $(r_k + a_k K)/S = 1/K, \forall k$ . For  $S \rightarrow \infty$ , denote  $S = CK$  and we have  $r_k/S + a_k/C = 1/K, \forall k$ .  
 422 Let  $C \rightarrow \infty$ , we have  $r_k/S \rightarrow 1/K, \forall k$ . Thus, we have  $y^* = \arg \max \text{diss}(\omega_y)$  due to Corollary 1.  
 423 To prove  $(\Leftarrow)$ ,  $\text{diss}(\omega_{y^*}) = 1$  implies that  $r_1 = \dots r_K = r_K$  and  $S \rightarrow \infty$ . Hence,  $\lim_{S \rightarrow \infty} P(y^* =$   
 424  $k) = \lim_{S \rightarrow \infty} (r_k + a_k K)/S = 1/K$ , which implies that  $y^* = \arg \max H[y]$  for  $S \rightarrow \infty$ .  $\square$

### 425 B Experimental Settings

426 We choose the Adam optimizer to train ADL for 600 epochs and setting the learning rate to  
 427 0.001. The coefficient of evidence strength loss,  $\lambda_1$ , is set to 0.005 (cross validated from  
 428  $\{0.001, 0.005, 0.03, 0.05\}$ ). The coefficient of the  $L_2$  regularizer,  $\lambda_2$ , is set to 0.05 (cross validated  
 429 from  $\{0.001, 0.005, 0.01, 0.03, 0.05, 0.08\}$ ). The  $\lambda$  for anchor sample identification is set to  
 430 0.005 (cross validated  $\{0.001, 0.005, 0.03, 0.05\}$ ). We choose RBF as our kernel function with length  
 431 scale set to 1 (cross validated from  $\{0.01, 0.1, 1\}$ ).

### 432 C Ablation Study

433 We have conducted a detailed ablation study to clearly demonstrate the effectiveness of each major  
 434 technical components. We adopt the MNIST data with 5 missing classes for illustration purpose.

435 **Sampling function.** Figure 6(a) compares proposed sampling method with other different sampling  
 436 criteria: entropy, vacuity only, and dissonance only. The result confirms the effectiveness of the  
 437 dynamically balanced sampling method. It is interesting to see that using vacuity alone performs  
 438 quite well in the initial phase but only converges to a lower accuracy in the end. In contrast, using  
 439 dissonance is slow to start but able to converge to a higher accuracy. The entropy curve roughly stays  
 440 in the middle of the above two curves.

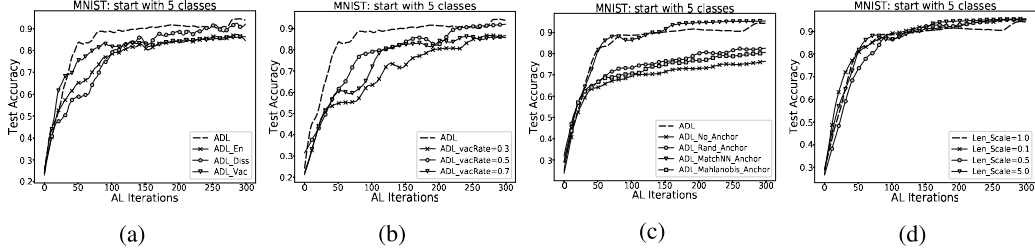

Figure 6: Ablation study (a) Comparison of different sampling criteria; (b) Comparison with different fixed vacuity/dissonance weighting; (c) Comparison with random anchor selection, no anchor samples, and attention kernel; (d) Impact of the characteristic length scale

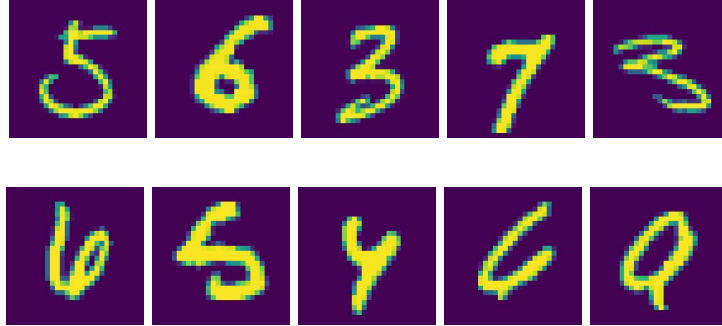

Figure 7: Samples with a high vacuity (top) and high dissonance (bottom) in early and late AL iterations, respectively.

441 **Vacuity/dissonance balancing.** Figure 6(b) shows the results using different fixed vacuity/dissonance  
 442 ratios. The dynamically balanced sampling method clearly outperforms the fixed weighting. This  
 443 also demonstrates the usefulness of the proposed entropy decomposition theory. Since the sampling  
 444 goal of AL changes with the accumulation of the labeled data, the optimal AL behavior can only be  
 445 achieved by adaptively adjust the importance of vacuity and dissonance in the sampling function.

446 **Anchor sample identification.** We have compared ADL with the randomly selected anchor samples  
 447 from unlabeled data and not using any anchor samples in Figure 6(c). ADL clearly outperforms  
 448 random selection, which in turn performs better than not using any anchor samples. We further  
 449 compare with the attention kernel as a more advanced distance metric for anchor sample identification.  
 450 The attention kernel is the major component in the matching network [19], where the spatial invariance  
 451 is ensured by CNN and the dimensionality of the inputs is reduced through two correlated LSTM  
 452 projections. However, the attention kernel (our current implementation) is much slower to compute  
 453 as compared with our approach especially when facing a very large unlabeled pool as the entire  
 454 candidate data samples need to be embedded every iteration when the training/testing data are changed  
 455 along with AL. Thus, if the improvement is not significant (see Figure 6(c)) and when the efficiency  
 456 becomes a bottleneck for a large unlabeled pool, the proposed approach appears to be a good choice  
 457 as it can provide a good balance between quality and efficiency, which is critical for AL.

458 We also implemented a state-of-the-art OOD detection method [20] based on Mahalanobis distance  
 459 for anchor sample identification. In general, the ODD detection methods primarily focus on detecting  
 460 OOD data samples so they may return isolated noisy samples, which will not help active sampling. In  
 461 contrast, our approach aims to locate anchor samples from densely distributed areas in the unlabeled  
 462 data space to better support active sampling. Our results in Figure 6(c) show that the method in  
 463 [20] performs very close to random anchor sampling (worse than ours). A potential reason may be  
 464 that this is a supervised model that requires well-labeled data to train, which is not the case for AL,  
 465 especially in early stage.

466 **RBF length scale.** We have investigated the impact of the characteristic length scale used in RBF  
 467 kernel on AL performance. Figure 6(d) shows that the ADL model performance is fairly robust to the  
 468 length scale and only shows minor change with different choices.

469 **Sample Images Chosen by ADL.** In order to better demonstrate the effectiveness of the vacuity  
470 measurement, we start active learning with 5 classes omitted from the initial training. Figure 7 (top)  
471 shows the samples with highest vacuity selected by ADL in the first 30 AL iterations. The first four  
472 of them are from missing classes. This clearly demonstrates the effectiveness of using vacuity to  
473 explore the data space. As a result, data samples from the missing classes are quickly identified and  
474 being labeled. The last sample is from class '3', whose examples have already been exposed to ADL.  
475 However, the writing style of this sample is very different than other instances from the same class,  
476 which result in a high vacuity. Figure 7 (bottom) shows the samples with highest dissonance selected  
477 by ADL in the last 100 AL iterations. By observing their predicted belief mass, we find that the high  
478 dissonance is due to the conflicting belief over multiple classes. For example, the first sample is  
479 confusing between classes '4' and '6'; the second sample is confusing among classes '5', '6', and '8';  
480 the third sample is confusing among classes '4', '7', and '9'; the fourth sample is confusing between  
481 classes '4' and '6'; and the fifth sample is confusing between classes '0' and '9'.

## 482 D Additional Experimental and Comparison Results

483 **Additional Results.** We obtain similar AL curves for notMNIST and CIFAR-10 when starting AL  
484 with 7 and 8 classes as with 5 and 6 classes, which are shown in Figure 8. In Figure 9, we also report  
485 the AL performance on the three datasets when there is no missing class. ADL still achieves the best  
486 performance in all cases with slightly less advantage than other models.

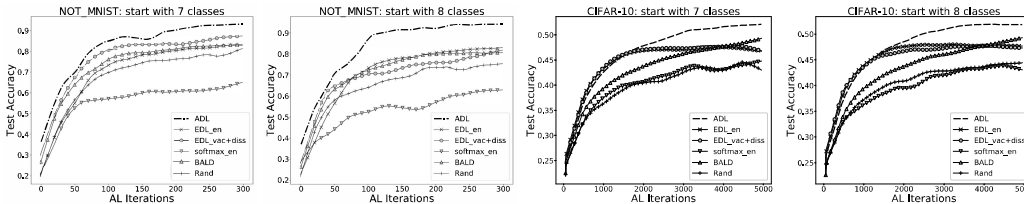

Figure 8: AL performance on notMNIST and CIFAR-10 (start with 7 and 8 classes)

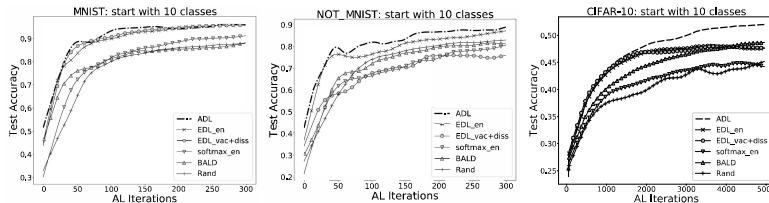

Figure 9: AL performance with no missing classes

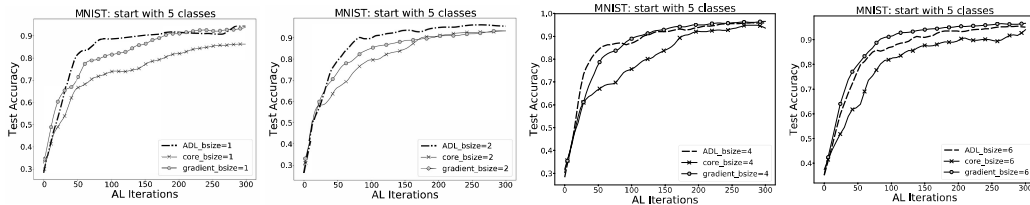

Figure 10: Comparison with batch-mode deep AL models

487 **Comparison with batch-mode AL models.** For batch AL, a key requirement is to ensure the  
488 diversity of the samples in the batch. This is the focus some recent state-of-the-art deep learning based  
489 batch-model AL models, through diverse gradient embedding [16] and cover set [3], respectively.  
490 Our model performs single batch AL, using second-order uncertainty to choose the single best sample  
491 each iteration. Further, the batch AL model usually uses a large batch size (100-1000), more than all  
492 labels ADL collects. We did experiment to compare ADL with [16] and [3] and the results are shown  
493 in Figure 10. ADL is clearly better in single batch AL and also better in small batches of 2-4. At  
494 batch 6, [16] outperforms ADL, which is still better than [3].

495 **Source code**

496 The code for this work can be found in [https://drive.google.com/drive/folders/](https://drive.google.com/drive/folders/1vRRvKlD_sZMM9by5Fne6gvKqf3ZyYzUm?usp=sharing)  
497 [1vRRvKlD\\_sZMM9by5Fne6gvKqf3ZyYzUm?usp=sharing](https://drive.google.com/drive/folders/1vRRvKlD_sZMM9by5Fne6gvKqf3ZyYzUm?usp=sharing)
